# Supplementary material for: Molecular Evolution of Cytochrome bd Oxidases across Proteobacterial Genomes
Source: PubMed Central journal article supplement (PMC5322542; doi:10.1093/gbe/evv032), 2015-02-16
Supplement: supp_evv032_supplementarymaterialMDEetalrevised.pdf [file supp_evv032_supplementarymaterialMDEetalrevised.pdf]

## Supplementary material

### **Fig. S1. Simplified view of the distance tree of DeltaBLAST results with 5000 *bd* oxidases.**

The NJ tree was obtained with all the results of a broad DELTABLAST search using *cydA* of *Bacillus subtilis* (accession: NP\_391755) as a query against 5000 species of proteobacteria excluding most  $\delta$ -proteobacteria and all  $\epsilon$ -proteobacteria, as well as Enterobacterales, to reduce sequence redundancy and the complex distribution of  $\delta$ -proteobacterial oxidases (see Fig. 1 and main text). Major possible instances of Lateral Gene Transfer (LGT) are indicated (see main text).

### **Fig. S2. Phylogenomic profile of gamma proteobacteria.**

The genomes of a selection of taxa representing all the major orders and families of  $\gamma$ -proteobacteria (cf. Rao and Gupta, 2007; Segata et al, 2013), including the taxa shown in Figs. 3-6 of the main article (shown in bold characters), were analysed and presented in a comprehensive phylogenetic tree as described in the Methods (main text).

### **Table S1. Compilation of the *bd* oxidases most studied in this work.**

Fig. S1 - Simplified view of the distance tree (NJ) of DeltaBLAST 5000 of all cytochrome *bd* oxidases.

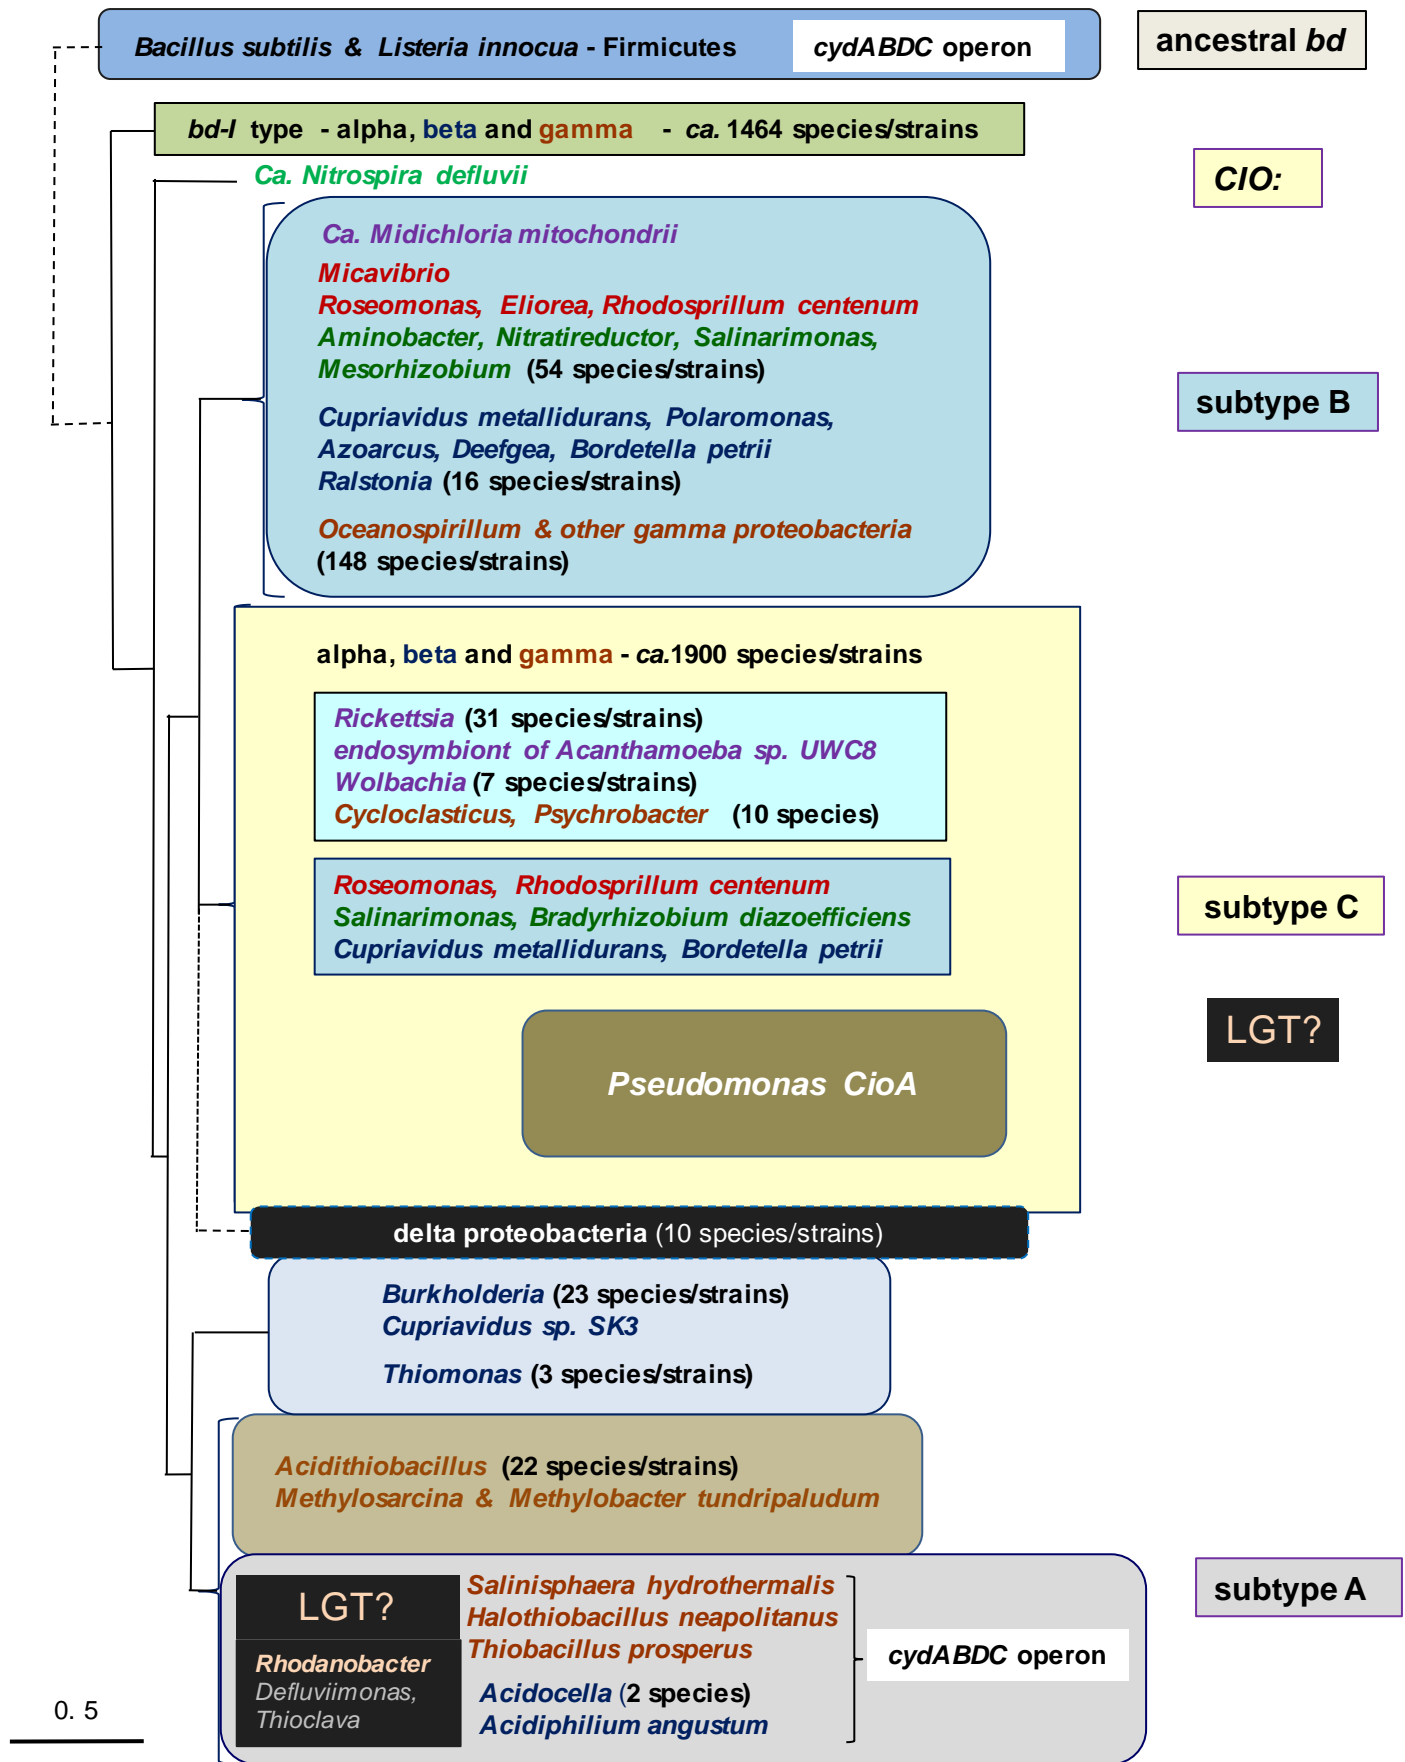

Fig. S1

**Figure S2 - Phylogenomics of gamma proteobacteria. In bold are the taxa used in the trees of Figs. 3-6.**

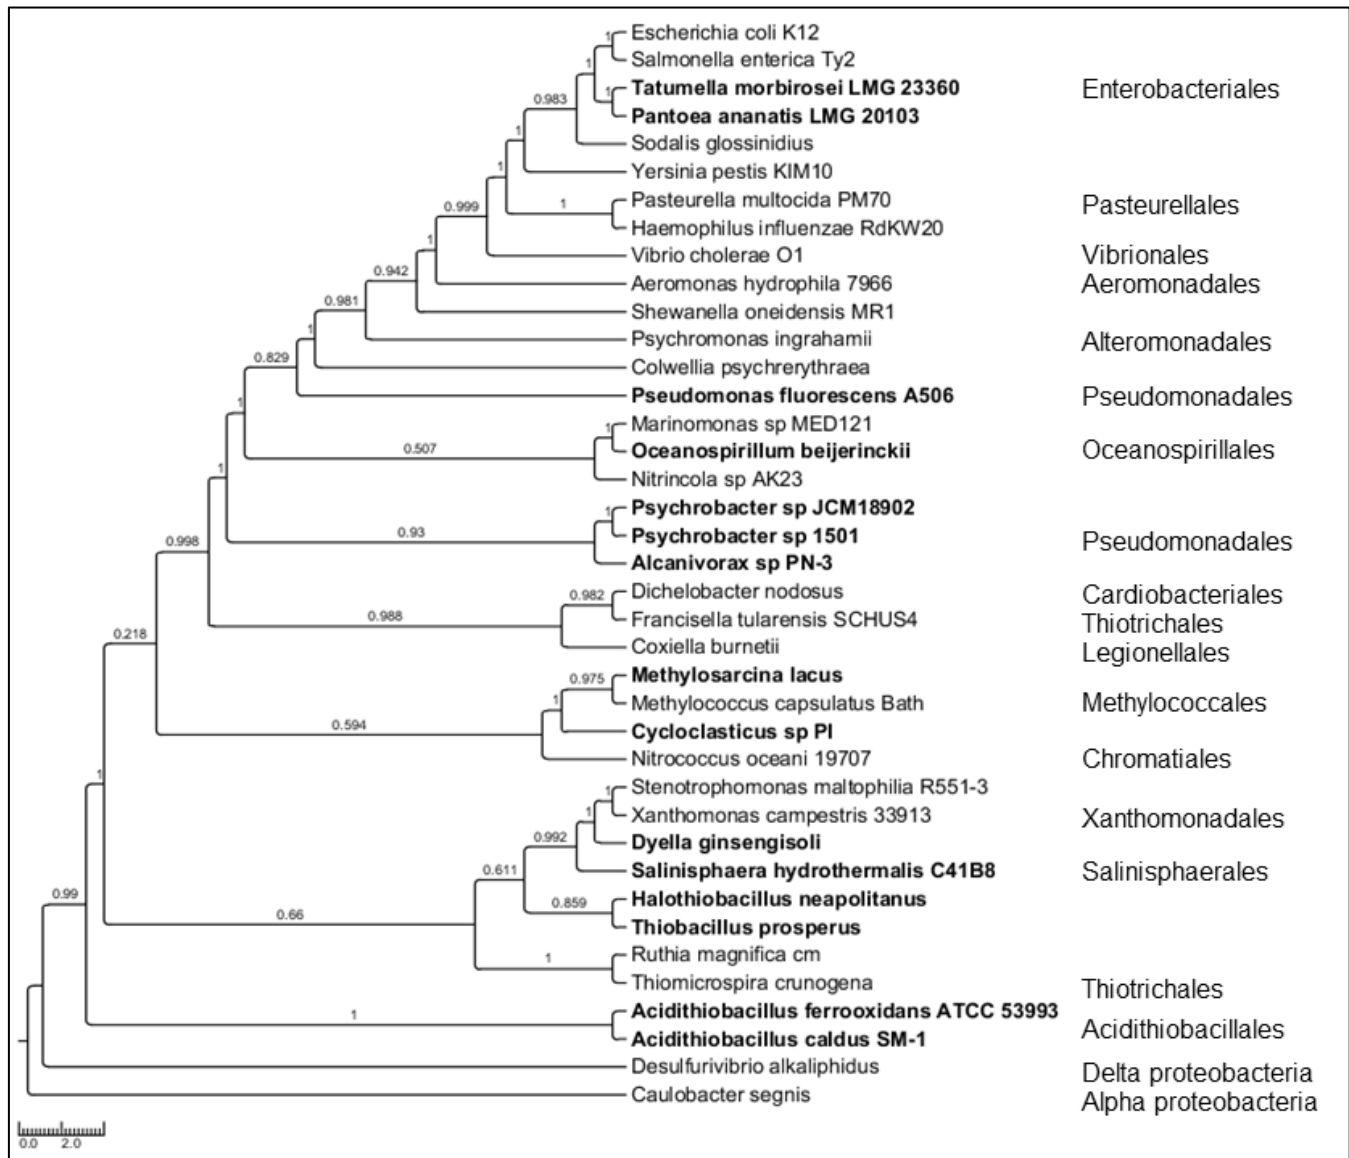

Fig. S2

**Table S1. Compilation of the *bd* oxidases most studied in this work.**

| organism                                      | accession                   | taxonomic group                          | <i>cydA</i> (aa) |                         | classification and notes                             |
|-----------------------------------------------|-----------------------------|------------------------------------------|------------------|-------------------------|------------------------------------------------------|
|                                               |                             |                                          | subunit I        | subunit II              |                                                      |
| <b>Eubacteria</b>                             |                             |                                          |                  |                         |                                                      |
| <i>Acidocella</i> sp. MX-AZ02                 | WP_008494833                | alpha proteobacteria                     | 480              | 347                     | CIO subtype A with <i>cydABDC</i> cluster            |
| <i>Acidocella facilis</i>                     | WP_026438987                | alpha proteobacteria                     | 480              | 347                     | CIO subtype A with <i>cydABDC</i> cluster            |
| <i>Acidiphilium angustum</i>                  | WP_029312988                | alpha proteobacteria                     | 480              | 348                     | CIO subtype A with <i>cydABDC</i> cluster            |
| <i>Salinisphaera hydrothermalis</i>           | KEZ78450                    | gamma proteobacteria                     | 478              | 350                     | CIO subtype A with <i>cydABDC</i> cluster            |
| <i>Halothiobacillus neapolitanus</i>          | ACX96129                    | gamma proteobacteria                     | 483              | 348                     | CIO subtype A with <i>cydABDC</i> cluster            |
| <i>Thiobacillus prosperus</i>                 | KFZ91409                    | gamma proteobacteria                     | 480              | 345                     | CIO subtype A with <i>cydABDC</i> cluster            |
| <i>Tatumella morbirosei</i>                   | KGD72389                    | gamma proteobacteria -<br>enterobacteria | 481              | 348                     | CIO subtype A, <i>cydDC</i> prepended                |
| <i>Defluviimonas</i> sp. 20V17                | KDB01967                    | alpha proteobacteria                     | 479              | 348                     | CIO subtype A, <i>cydD</i> only                      |
| <i>Acidithiobacillus caldus</i>               | WP_014002943                | gamma proteobacteria                     | 484              | missing                 | CIO subtype A degenerate                             |
| <i>Rhodanobacter</i> sp. 115                  | EIL96202                    | gamma proteobacteria                     | 478              | missing                 | CIO subtype A degenerate                             |
| <i>Methylosarcina lacus</i>                   | WP_029646396                | gamma proteobacteria                     | 452              | 334 in separate cluster | CIO subtype A degenerate                             |
| <i>Methylobacter tundripaludum</i>            | WP_031436940                | gamma proteobacteria                     | 486              | 336 in separate cluster | CIO subtype A degenerate                             |
| <i>Acidithiobacillus thiooxidans</i>          | WP_024895144                | gamma proteobacteria                     | 482              | 345                     | subunit I clustering with subtype A, no <i>cydDC</i> |
| <i>Thiomonas intermedia</i>                   | Tint_0239,<br>YP_003641981  | beta proteobacteria                      | 494              | 341                     | subunit I clustering with subtype A, no <i>cydDC</i> |
| <i>Burkholderia</i> sp. BT03                  | EUC12370                    | beta proteobacteria                      | 463              | 328                     | subunit I clustering with subtype A, no <i>cydDC</i> |
| <b>Cα. Midichloria mitochondrii</b>           |                             |                                          |                  |                         |                                                      |
| <i>Cα. Midichloria mitochondrii</i>           | midl_00095,<br>YP_004679103 | alpha proteobacteria                     | 443              | 316                     | CIO subtype B                                        |
| <i>Rhodospirillum centenum</i> SW             | RC1_0287,<br>YP_002296549   | alpha proteobacteria                     | 448              | 335                     | CIO subtype B                                        |
| <i>Micavibrio aeruginosavorus</i>             | YP_004864645,<br>MICA_298   | alpha proteobacteria                     | 457              | 335                     | CIO subtype B                                        |
| <i>Mesorhizobium loti</i>                     | WP_027062122                | alpha proteobacteria                     | 453              | 334                     | CIO subtype B                                        |
| <i>Roseomonas cervicalis</i> ATCC 49957       | EFH12552                    | alpha proteobacteria                     | 447              | 337                     | CIO subtype B                                        |
| <i>Elioraea tepidiphila</i>                   | WP_019014234                | alpha proteobacteria                     | 444              | 337                     | CIO subtype B                                        |
| <i>Terasakiella pusilla</i>                   | WP_028880378                | alpha proteobacteria                     | 449              | 336                     | CIO subtype B                                        |
| <i>Salinarimonas rosea</i>                    | WP_029030014                | alpha proteobacteria                     | 464              | 340                     | CIO subtype B                                        |
| <i>Oceanospirillum beijerinckii</i>           | WP_028301376                | gamma proteobacteria                     | 453              | 332                     | CIO subtype B                                        |
| <i>Teredinibacter turnerae</i> T7901          | TERTU_0322,<br>YP_003071988 | gamma proteobacteria                     | 454              | 334                     | CIO subtype B                                        |
| <i>Cupriavidus metallidurans</i> CH34         | Rmet_5232<br>YP_587360      | beta proteobacteria                      | 453              | 345                     | CIO subtype B                                        |
| <i>Polaromonas naphthalenivorans</i> CJ2      | Pnap_0495<br>YP_980736      | beta proteobacteria                      | 470              | 343                     | CIO subtype B                                        |
| <i>beta proteobacterium</i> L13               | WP_017509874                | beta proteobacteria                      | 442              | 336                     | CIO subtype B                                        |
| <i>Deefgea rivuli</i>                         | WP_027467314                | beta proteobacteria                      | 445              | 341                     | CIO subtype B                                        |
| <b>CIO subtype C</b>                          |                             |                                          |                  |                         |                                                      |
| <i>Acetobacter pasteurianus</i> 386B          | APA386B_1011                | alpha proteobacteria                     | 477              | 338                     | CIO subtype C                                        |
| <i>Acetobacter pasteurianus</i> IFO 3283-01   | APA01_21500                 | alpha proteobacteria                     | 477              | 336                     | CIO subtype C                                        |
| <i>Acidiphilium angustum</i>                  | WP_029312988                | alpha proteobacteria                     | 480              | 348                     | CIO subtype C                                        |
| <i>Acidiphilium cryptum</i>                   | Acry_2040                   | alpha proteobacteria                     | 472              | 341                     | CIO subtype C                                        |
| <i>Acidiphilium multivorum</i>                | ACMV_22850                  | alpha proteobacteria                     | 472              | 341                     | CIO subtype C                                        |
| <i>Acidomonas methanolica</i> NBRC            | GAI28377                    | alpha proteobacteria                     | 477              | 339                     | CIO subtype C                                        |
| <i>Agrobacterium radiobacter</i> K84          | Arad_12230                  | alpha proteobacteria                     | 475              | 335                     | CIO subtype C                                        |
| <i>alpha bacterium</i> BAL-199                | EDP63365                    | alpha proteobacteria                     | 473              | 343                     | CIO subtype C                                        |
| <i>Asaia</i> sp. SF2.1                        | WP_023978129                | alpha proteobacteria                     | 469              | 340                     | CIO subtype C                                        |
| <i>Asticcacaulis benevestitus</i>             | WP_018084088                | alpha proteobacteria                     | 471              | 337                     | CIO subtype C                                        |
| <i>Azorhizobium caulinodans</i> ORS 571       | AZC_3759                    | alpha proteobacteria                     | 478              | 335                     | CIO subtype C                                        |
| <i>Azorhizobium caulinodans</i> ORS 571       | AZC_1354                    | alpha proteobacteria                     | 470              | 329                     | CIO subtype C                                        |
| <i>Azospirillum lipoferum</i>                 | AZOLl_p30515                | alpha proteobacteria                     | 465              | 339                     | CIO subtype C                                        |
| <i>Bartonella tamiae</i>                      | EJF93580                    | alpha proteobacteria                     | 468              | 335                     | CIO subtype C                                        |
| <i>Beijerinckia indica</i>                    | Bind_3288                   | alpha proteobacteria                     | 462              | 339                     | CIO subtype C                                        |
| <i>Bradyrhizobium diazoefficiens</i> USDA     | blI0283 &                   | alpha proteobacteria                     | 468              | 328                     | CIO subtype C                                        |
| <i>Bradyrhizobium oligotrophicum</i> S58      | S58_06340                   | alpha proteobacteria                     | 468              | 336                     | CIO subtype C                                        |
| <i>Bradyrhizobium</i> sp. STM 3843            | WP_008973060                | alpha proteobacteria                     | 467              | 343                     | CIO subtype C                                        |
| <i>Bradyrhizobium</i> sp. DFCI-1              | WP_021079049                | alpha proteobacteria                     | 468              | 333                     | CIO subtype C                                        |
| <i>Bradyrhizobium</i> sp. Ec3.3               | WP_027526639                | alpha proteobacteria                     | 466              | 336                     | CIO subtype C                                        |
| <i>Bradyrhizobium</i> sp. S23321              | S23_13360                   | alpha proteobacteria                     | 469              | 328                     | CIO subtype C                                        |
| <i>endosymbiont of Acanthamoeba</i> sp.       | AIF81514                    | alpha proteobacteria                     | 465              | 337                     | CIO subtype C                                        |
| <i>Geminicoccus roseus</i>                    | WP_027132750                | alpha proteobacteria                     | 479              | 333                     | CIO subtype C                                        |
| <i>Gluconacetobacter</i> or                   | WP_019086429                | alpha proteobacteria                     | 477              | 339                     | CIO subtype C                                        |
| <i>Gluconacetobacter diazotrophicus</i> PAI 5 | Gdia_1472                   | alpha proteobacteria                     | 466              | 335                     | CIO subtype C                                        |
| <i>Gluconacetobacter xylinus</i> NBRC 3288    | GLX_30020                   | alpha proteobacteria                     | 477              | 339                     | CIO subtype C                                        |
| <i>Gluconobacter frateurii</i>                | WP_010501967                | alpha proteobacteria                     | 474              | 341                     | CIO subtype C                                        |
| <i>Gluconobacter morbifer</i>                 | EHH67656                    | alpha proteobacteria                     | 476              | 341                     | CIO subtype C                                        |
| <i>Gluconobacter oxydans</i> 621H             | GOX0278                     | alpha proteobacteria                     | 471              | 341                     | CIO subtype C                                        |
| <i>Gluconobacter oxydans</i> H24              | B932_2110                   | alpha proteobacteria                     | 474              | 341                     | CIO subtype C                                        |
| <i>Granulibacter bethediensis</i>             | GbCGDNIH1_013               | alpha proteobacteria                     | 482              | 342                     | CIO subtype C                                        |
| <i>Hyphomicrobium</i> sp. MC1                 | HYPMC_4893                  | alpha proteobacteria                     | 475              | 337                     | CIO subtype C                                        |
| <i>Inquilinus limosus</i>                     | WP_026872492                | alpha proteobacteria                     | 465              | 335                     | CIO subtype C                                        |

Table S1... continued

| organism                                                                | accession                    | taxonomic group                       | cydA (aa)  |            | classification and notes                |
|-------------------------------------------------------------------------|------------------------------|---------------------------------------|------------|------------|-----------------------------------------|
|                                                                         |                              |                                       | subunit I  | subunit II |                                         |
|                                                                         |                              | <b>Eubacteria</b>                     |            |            |                                         |
| <b>Methylobacterium extorquens DSM</b>                                  | EHP90754                     | alpha proteobacteria                  | <b>472</b> | <b>335</b> | CIO subtype C                           |
| <b>Methylobacterium nodulans</b>                                        | Mnod_3333                    | alpha proteobacteria                  | <b>478</b> | <b>335</b> | CIO subtype C                           |
| <b>Methylobacterium populi</b>                                          | Mpop_5132                    | alpha proteobacteria                  | <b>474</b> | <b>336</b> | CIO subtype C                           |
| <b>Methylobacterium radiotolerans</b>                                   | Mrad2831_4861                | alpha proteobacteria                  | <b>470</b> | <b>328</b> | CIO subtype C                           |
| <b>Methylobacterium radiotolerans</b>                                   | Mrad2831_4927                | alpha proteobacteria                  | <b>472</b> | <b>335</b> | CIO subtype C                           |
| <b>Methylobacterium sp. 4-46</b>                                        | M446_4323                    | alpha proteobacteria                  | <b>478</b> | <b>334</b> | CIO subtype C                           |
| <b>Methylobacterium sp. 4-46</b>                                        | M446_1250                    | alpha proteobacteria                  | <b>482</b> | <b>347</b> | CIO subtype C                           |
| <b>Methylobacterium sp. GXF4</b>                                        | EIZ81581                     | alpha proteobacteria                  | <b>472</b> | <b>335</b> | CIO subtype C                           |
| <b>Methylobacterium extorquens AM1</b>                                  | MexAM1_META1 p4206           | alpha proteobacteria                  | <b>474</b> | <b>336</b> | CIO subtype C                           |
| <b>Methylobacterium extorquens AM1</b>                                  | MexAM1_META2 p1123 - plasmid | alpha proteobacteria                  | <b>472</b> | <b>335</b> | CIO subtype C                           |
| <b>Methylobacterium extorquens DM4</b>                                  | METDI4817                    | alpha proteobacteria                  | <b>474</b> | <b>336</b> | CIO subtype C                           |
| <b>Methylobacterium extorquens PA1</b>                                  | Mext_3834                    | alpha proteobacteria                  | <b>474</b> | <b>336</b> | CIO subtype C                           |
| <b>Methylocella silvestris BL2</b>                                      | Msil_2188                    | alpha proteobacteria                  | <b>472</b> | <b>335</b> | CIO subtype C                           |
| <b>Methylocella silvestris BL2</b>                                      | Msil_2644                    | alpha proteobacteria                  | <b>474</b> | <b>335</b> | CIO subtype C                           |
| <b>Microvirga lotononidis</b>                                           | WP_009493026                 | alpha proteobacteria                  | <b>473</b> | <b>335</b> | CIO subtype C                           |
| <b>Oligotropha carboxidovorans OM5</b>                                  | OCAR_4639                    | alpha proteobacteria                  | <b>468</b> | <b>337</b> | CIO subtype C                           |
| <b>Paracoccus denitrificans PD1222</b>                                  | Pden_4010                    | alpha proteobacteria                  | <b>467</b> | <b>334</b> | CIO subtype C, also called <i>qxtAB</i> |
| <b>Parvibaculum lavamentivorans DS-1</b>                                | Plav_0596                    | alpha proteobacteria                  | <b>463</b> | <b>336</b> | CIO subtype C                           |
| <b>Phaeobacter gallaeciensis DSM 17395</b>                              | PGA1_c19670                  | alpha proteobacteria                  | <b>474</b> | <b>334</b> | CIO subtype C                           |
| <b>Pseudovibrio sp. FO-BEG1</b>                                         | PSE_1416                     | alpha proteobacteria                  | <b>404</b> | <b>334</b> | CIO subtype C                           |
| <b>Rhizobium sp. CF122</b>                                              | EJL50761                     | alpha proteobacteria                  | <b>468</b> | <b>331</b> | CIO subtype C                           |
| <b>Rhodobacter sphaeroides 2.4.1</b>                                    | RSP_3212                     | alpha proteobacteria                  | <b>465</b> | <b>335</b> | CIO subtype C, also called <i>qxtAB</i> |
| <b>Rhodomicrobium vaniellii</b>                                         | Rvan_0181                    | alpha proteobacteria                  | <b>464</b> | <b>337</b> | CIO subtype C                           |
| <b>Rhodopseudomonas palustris BisA53</b>                                | RPE_0539                     | alpha proteobacteria                  | <b>468</b> | <b>338</b> | CIO subtype C                           |
| <b>Rhodopseudomonas palustris BisB5</b>                                 | RPD_4378                     | alpha proteobacteria                  | <b>468</b> | <b>334</b> | CIO subtype C                           |
| <b>Rhodopseudomonas palustris CA009</b>                                 | RPA4793                      | alpha proteobacteria                  | <b>468</b> | <b>336</b> | CIO subtype C                           |
| <b>Rhodopseudomonas palustris TIE-1</b>                                 | Rpal_1533                    | alpha proteobacteria                  | <b>465</b> | <b>341</b> | CIO subtype C                           |
| <b>Rhodospirillum centenum</b>                                          | RC1_0416                     | alpha proteobacteria                  | <b>479</b> | <b>339</b> | CIO subtype C                           |
| <b>Rickettsia canadensis str. McKiel</b>                                | A1E_01235                    | alpha proteobacteria                  | <b>454</b> | <b>339</b> | CIO subtype C                           |
| <b>Rickettsia conorii str. Malish 7</b>                                 | RC0288, NP_359925            | alpha proteobacteria                  | <b>456</b> | <b>339</b> | CIO subtype C                           |
| <b>Rickettsia felis URRWXCa2</b>                                        | RF_0333                      | alpha proteobacteria                  | <b>456</b> | <b>339</b> | CIO subtype C                           |
| <b>Rickettsia massiliae MTU5</b>                                        | RMA_0296, YP_001499104       | alpha proteobacteria                  | <b>430</b> | <b>339</b> | CIO subtype C                           |
| <b>Rickettsia parkeri str. Portsmouth</b>                               | MCI_01625, YP_005392544      | alpha proteobacteria                  | <b>456</b> | <b>339</b> | CIO subtype C                           |
| <b>Rickettsia peacockii strain Rustic</b>                               | RPR_01820                    | alpha proteobacteria                  | <b>456</b> | <b>339</b> | CIO subtype C                           |
| <b>Rickettsia typhi str. TH1527</b>                                     | RTH1527_01005                | alpha proteobacteria                  | <b>447</b> | <b>339</b> | CIO subtype C - no COX in genome        |
| <b>Rickettsiaceae bacterium Os18</b>                                    | WP_019231091                 | alpha proteobacteria                  | <b>470</b> | <b>339</b> | CIO subtype C                           |
| <b>Roseomonas cervicalis ATCC 49957</b>                                 | WP_007003071                 | alpha proteobacteria                  | <b>469</b> | <b>354</b> | CIO subtype C                           |
| <b>Salinarimonas rosea</b>                                              | WP_029032601                 | alpha proteobacteria                  | <b>481</b> | <b>347</b> | CIO subtype C                           |
| <b>Sphingobium xenophagum</b>                                           | WP_019054127                 | alpha proteobacteria                  | <b>467</b> | <b>332</b> | CIO subtype C                           |
| <b>Starkeya novella</b>                                                 | Snov_0620                    | alpha proteobacteria                  | <b>469</b> | <b>340</b> | CIO subtype C                           |
| <b>Starkeya novella</b>                                                 | Snov_3535                    | alpha proteobacteria                  | <b>474</b> | <b>346</b> | CIO subtype C                           |
| <b>Thalassospira profundimaris</b>                                      | EKF07979                     | alpha proteobacteria                  | <b>462</b> | <b>332</b> | CIO subtype C                           |
| <b>Tistrella mobilis</b>                                                | TMO_b0108                    | alpha proteobacteria                  | <b>491</b> | <b>336</b> | CIO subtype C                           |
| <b>Wolbachia endosymbiont of Drosophila melanogaster</b>                | WD0740                       | alpha proteobacteria                  | <b>468</b> | <b>340</b> | CIO subtype C                           |
| <b>Wolbachia wRi</b>                                                    | YP_002727277                 | alpha proteobacteria                  | <b>468</b> | <b>340</b> | CIO subtype C                           |
| <b>Zymomonas mobilis subsp. mobilis NCIMB 11163</b>                     | Za10_1638                    | alpha proteobacteria                  | <b>476</b> | <b>340</b> | CIO subtype C                           |
| <b>Pseudomonas fluorescens A506</b>                                     | PfiA506_4640                 | gamma proteobacteria                  | <b>479</b> | <b>335</b> | CIO subtype C, also called <i>cioAB</i> |
| <b>Cycloclasticus sp. P1</b>                                            | YP_006836894, Q91_0351       | gamma proteobacteria                  | <b>470</b> | <b>339</b> | CIO subtype C                           |
| <b>Cycloclasticus pugetii</b>                                           | WP_020161758                 | gamma proteobacteria                  | <b>470</b> | <b>339</b> | CIO subtype C                           |
| <b>Psychrobacter sp. G</b>                                              | PSYCG_08730, YP_008163613    | gamma proteobacteria                  | <b>497</b> | <b>379</b> | CIO subtype C                           |
| <b>Psychrobacter sp. JCM 18902</b>                                      | GAF58390                     | gamma proteobacteria                  | <b>498</b> | <b>338</b> | CIO subtype C                           |
| <b>Psychrobacter sp. 1501(2011)</b>                                     | WP_007395587                 | gamma proteobacteria                  | <b>497</b> | <b>338</b> | CIO subtype C                           |
| <b>Azotobacter vinelandii DJ</b>                                        | Avin_11050                   | gamma proteobacteria                  | <b>476</b> | <b>335</b> | CIO subtype C                           |
| <b>Legionella pneumophila subsp. pneumophila</b>                        | LPO_0235                     | gamma proteobacteria                  | <b>456</b> | <b>329</b> | CIO subtype C                           |
| <b>Frateuria aurantia DSM 6220</b>                                      | Fraau_2907, YP_005378918     | gamma proteobacteria                  | <b>465</b> | <b>335</b> | CIO subtype C                           |
| <b>Salmonella enterica subsp. enterica serovar Thompson str. RM6836</b> | IA1_01940, YP_008612210      | gamma proteobacteria - enterobacteria | <b>467</b> | <b>336</b> | CIO subtype C                           |
| <b>Burkholderia gladioli</b>                                            | WP_013690153                 | beta proteobacteria                   | <b>465</b> | <b>336</b> | CIO subtype C                           |
| <b>Ralstonia eutropha JMP134</b>                                        | Reut_B4101                   | beta proteobacteria                   | <b>483</b> | <b>335</b> | CIO subtype C                           |
| <b>Desulfovibrio magneticus RS-1</b>                                    | DMR_06960, YP_002952073      | delta proteobacteria                  | <b>461</b> | <b>338</b> | CIO subtype C                           |
| <b>Desulfococcus multivorans</b>                                        | WP_020877073                 | delta proteobacteria                  | <b>459</b> | <b>332</b> | CIO subtype C                           |
| <b>Ca. Nitrospira defluvi</b>                                           | YP_003798241                 | Nitrospirales                         | <b>447</b> | <b>340</b> | CIO ancestral                           |

Table S1... continued

| organism                                       | accession                 | taxonomic group                       | cydA (aa) |                         | classification and notes                                  |
|------------------------------------------------|---------------------------|---------------------------------------|-----------|-------------------------|-----------------------------------------------------------|
|                                                |                           |                                       | subunit I | subunit II              |                                                           |
| Rhodopseudomonas palustris HaA2                | RPB_0929, YP_484550       | alpha proteobacteria                  | 524       | 383                     | <i>bd</i> -1, <i>cydDC</i> appended                       |
| Rhodopseudomonas palustris DX-1                | Rpdx1_2434                | alpha proteobacteria                  | 528       | 383                     | <i>bd</i> -1, <i>cydDC</i> appended                       |
| Pleomorphomonas oryzae                         | WP_026791401              | alpha proteobacteria                  | 527       | 383                     | <i>bd</i> -1, <i>cydDC</i> appended                       |
| Rhodospirillum photometricum                   | RSPPHO_01249              | alpha proteobacteria                  | 561       | 384                     | <i>bd</i> -1, <i>cydDC</i> appended                       |
| Rhodovulum sp. PH10                            | WP_008390734              | alpha proteobacteria                  | 531       | 383                     | <i>bd</i> -1, <i>cydDC</i> appended                       |
| Thioclava sp. DT23-4                           | KEO53817                  | alpha proteobacteria                  | 541       | 382                     | <i>bd</i> -1, <i>cydDC</i> appended                       |
| Phaeospirillum molischianum                    | CCG40832                  | alpha proteobacteria                  | 525       | 385                     | <i>bd</i> -1, <i>cydDC</i> appended                       |
| Thioflaviccoccus mobilis                       | Thimo_0355, YP_007242856  | gamma proteobacteria                  | 519       | 377                     | <i>bd</i> -1, <i>cydDC</i> appended                       |
| Dyella ginsengisoli                            | WP_017460853              | gamma proteobacteria                  | 534       | 377                     | <i>bd</i> -1, <i>cydDC</i> appended                       |
| Frateuria aurantia DSM 6220                    | Fraau_1563, YP_005377664  | gamma proteobacteria                  | 528       | 378                     | <i>bd</i> -1, <i>cydDC</i> appended                       |
| Pantoea sp. At-9b                              | Pat9b_04265, YP_004114307 | gamma proteobacteria - enterobacteria | 480       | 348                     | <i>bd</i> -1, <i>cydDC</i> appended                       |
| Pantoea sp. AS-PWVM4                           | ERK15167                  | gamma proteobacteria - enterobacteria | 480       | 348                     | <i>bd</i> -1, <i>cydDC</i> appended                       |
| Tatumella morbirosei enterobacteria            | KGD72389                  | gamma proteobacteria - enterobacteria | 481       | 348                     | <i>bd</i> -1, <i>cydDC</i> appended                       |
| Kinetoplastibacterium blastocritidii           | RCUE_0079, YP_007449673   | beta proteobacteria                   | 521       | 384                     | <i>bd</i> -1, <i>cydDC</i> appended                       |
| Desulfurivibrio alkaliphilus AHT2              | DaAHT2_0790,              | delta proteobacteria                  | 442       | 342                     | <i>bd</i> -1, <i>cydDC</i> appended                       |
| Xanthomonadaceae bacterium 3.5X                | KG178673                  | gamma proteobacteria                  | 522       | 377                     | <i>bd</i> -1, <i>cydD</i> only appended                   |
| Coxiella burnetii RSA 493 - <i>cydA2</i>       | NP_819973                 | gamma proteobacteria                  | 521       | 377                     | subunit I clustering with <i>bd</i> -1, no <i>cydDC</i>   |
| Acidocella sp. MX-AZ02                         | WP_008494805              | alpha proteobacteria                  | 536       | 379                     | <i>bd</i> -1, <i>cydDC</i> prepended                      |
| Acidiphilium angustum                          | WP_029312671              | alpha proteobacteria                  | 536       | 379                     | <i>bd</i> -1, <i>cydDC</i> prepended                      |
| Acidiphilium multivorum AIU301                 | YP_004283908              | alpha proteobacteria                  | 537       | 379                     | <i>bd</i> -1, <i>cydDC</i> prepended                      |
| Acetobacter pasteurianus 386B                  | APA386B_473               | alpha proteobacteria                  | 537       | 379                     | <i>bd</i> -1, <i>cydDC</i> prepended                      |
| Gluconacetobacter or Komagataebacter europaeus | WP_019092290              | alpha proteobacteria                  | 536       | 379                     | <i>bd</i> -1, <i>cydDC</i> prepended                      |
| Acidomonas methanolica NBRC 104435             | GAJ28292                  | alpha proteobacteria                  | 535       | 383                     | <i>bd</i> -1, <i>cydDC</i> prepended                      |
| Roseomonas sp. B5                              | WP_019461856              | alpha proteobacteria                  | 522       | 382                     | <i>bd</i> -1, <i>cydDC</i> prepended                      |
| Rubritepida flocculans                         | WP_027285067              | alpha proteobacteria                  | 530       | 384                     | <i>bd</i> -1, <i>cydDC</i> prepended                      |
| Tistrella mobilis                              | TMO_a0189                 | alpha proteobacteria                  | 537       | 384                     | <i>bd</i> -1, <i>cydDC</i> prepended                      |
| Rhodospirillum centenum SW                     | RC1_4036                  | alpha proteobacteria                  | 523       | 384                     | <i>bd</i> -1, <i>cydDC</i> prepended                      |
| Oceanibaculum indicum                          | WP_008945285              | alpha proteobacteria                  | 530       | 384                     | <i>bd</i> -1, <i>cydDC</i> prepended                      |
| Caulobacter sp. K31                            | Caul_0634                 | alpha proteobacteria                  | 526       | 381                     | <i>bd</i> -1, <i>cydDC</i> prepended                      |
| Caulobacter crescentus NA1000                  | CCNA_00800                | alpha proteobacteria                  | 520       | 383                     | <i>bd</i> -1, <i>cydDC</i> prepended                      |
| Methylobacterium extorquens PA1                | Mext_1360                 | alpha proteobacteria                  | 529       | 384                     | <i>bd</i> -1, <i>cydDC</i> prepended                      |
| Brucella melitensis biovar Abortus 2308        | BAB2_0728                 | alpha proteobacteria                  | 504       | 384                     | <i>bd</i> -1, <i>cydDC</i> prepended                      |
| Brucella suis 1330 or melitensis               | BMNI_II0476,              | alpha proteobacteria                  | 525       | 384                     | <i>bd</i> -1, <i>cydDC</i> prepended                      |
| Rhizobium etli CIAT 652                        | RHECIAT_PC0000175         | alpha proteobacteria                  | 526       | 384                     | <i>bd</i> -1, <i>cydDC</i> prepended                      |
| Liberibacter crescens BT-1                     | B488_01440                | alpha proteobacteria                  | 504       | 366                     | <i>bd</i> -1, <i>cydDC</i> prepended                      |
| Salinisphaera hydrothermalis                   | KEZ76806                  | gamma proteobacteria                  | 526       | 377                     | <i>bd</i> -1, <i>cydDC</i> prepended                      |
| Psychrobacter sp. PRwf-1                       | PsycPRwf_0327             | gamma proteobacteria                  | 532       | 338                     | <i>bd</i> -1, <i>cydDC</i> prepended                      |
| Variovorax paradoxus B4 - beta                 | VAPA_1c34620              | beta proteobacteria                   | 537       | 384                     | <i>bd</i> -1, <i>cydDC</i> prepended                      |
| Burkholderia kururiensis                       | WP_017772623              | beta proteobacteria                   | 529       | 378                     | <i>bd</i> -1, <i>cydDC</i> prepended                      |
| Streptomyces fulvissimus DSM 40593             | YP_007932425              | Actinomycetes                         | 515       | 333                     | subunit I similar to <i>bd</i> -1                         |
| Listeria innocua                               | WP_003772850              | Firmicutes                            | 510       | 339 in separate cluster | <i>bd</i> -1 degenerate                                   |
| Escherichia coli str. K-12 substr. W3110       | b0733, NP_415261          | gamma proteobacteria - enterobacteria | 522       | 379                     | <i>bd</i> -1 with <i>cydABX</i> , prototypic <i>bd</i> -1 |
| Vibrio cholerae LMA3984-4                      | VCLMA_B0643, YP_005632513 | gamma proteobacteria - enterobacteria | 526       | 378                     | <i>bd</i> -1 with <i>cydABX</i>                           |
| Pantoea agglomerans - $\gamma$                 | EZI36193                  | gamma proteobacteria - enterobacteria | 470       | 344                     | <i>bd</i> -1 with <i>cydABX</i>                           |
| Pantoea sp. At-9b - $\gamma$                   | Pat9b_3272, YP_004117124  | gamma proteobacteria - enterobacteria | 471       | 344                     | <i>bd</i> -1 with <i>cydABX</i>                           |
| Phaeospirillum fulvum                          | WP_021133524              | alpha proteobacteria                  | 525       | 384                     | <i>bd</i> -1 with <i>cydABX</i>                           |
| Methylocystis sp. SC2                          | BN69_2246                 | alpha proteobacteria                  | 524       | 379                     | <i>bd</i> -1 with <i>cydAB</i>                            |
| Geminicoccus roseus                            | WP_027133135              | alpha proteobacteria                  | 529       | 379                     | <i>bd</i> -1 with <i>cydABX</i>                           |
| Pleomorphomonas koreensis                      | WP_026784703              | alpha proteobacteria                  | 525       | 383                     | <i>bd</i> -1 with <i>cydABX</i>                           |
| Inquilinus limosus                             | WP_026868948              | alpha proteobacteria                  | 525       | 380                     | <i>bd</i> -1 with <i>cydABX</i>                           |
| Novispirillum itersoni                         | WP_019645898              | alpha proteobacteria                  | 521       | 380                     | <i>bd</i> -1 with <i>cydABX</i>                           |
| Acidithiobac ferroxidans                       | YP_002219519, Lferr_1070  | gamma proteobacteria                  | 544       | 387                     | <i>bd</i> -1 with <i>cydABX</i>                           |
| Acidithiobac caldus                            | YP_004749631, Atc_2281    | gamma proteobacteria                  | 546       | 377                     | <i>bd</i> -1 with <i>cydABX</i>                           |
| Thiorhodococcus drewsii                        | EGV30141                  | gamma proteobacteria                  | 534       | 380                     | <i>bd</i> -1 with <i>cydABX</i>                           |
| Methylobacter luteus                           | WP_027157314              | gamma proteobacteria                  | 521       | 379                     | <i>bd</i> -1 with <i>cydABX</i>                           |
| Methylosarcina fibrata                         | WP_020563382              | gamma proteobacteria                  | 521       | 379                     | <i>bd</i> -1 with <i>cydABX</i>                           |
| Azotobacter vinelandii DJ                      | Avin_19890                | gamma proteobacteria                  | 537       | 379                     | <i>bd</i> -1 with <i>cydABX</i>                           |
| Legionella pneumophila 2300/99 Alcoy           | lpa_01861                 | gamma proteobacteria                  | 510       | 378                     | <i>bd</i> -1 with <i>cydAB</i>                            |
| Methylococcus capsulatus Bath                  | YP_113575                 | gamma proteobacteria                  | 525       | 378                     | <i>bd</i> -1 with <i>cydABX</i>                           |
| Bordetella avium                               | BAV0991, YP_785514        | beta proteobacteria                   | 525       | 377                     | <i>bd</i> -1 with <i>cydABX</i>                           |
| Thiomonas intermedia (multispecies)            | YP_003641759, Tint_0013   | beta proteobacteria                   | 545       | 377                     | <i>bd</i> -1 with <i>cydABX</i>                           |
| Sideroxydans lithotrophicus ES-1               | Slit_1151                 | beta proteobacteria                   | 521       | 379                     | <i>bd</i> -1 with <i>cydABX</i>                           |

Table S1... continued – end.

| organism                                                              | accession                 | taxonomic group                       | cydA (aa) |            | classification and notes                             |
|-----------------------------------------------------------------------|---------------------------|---------------------------------------|-----------|------------|------------------------------------------------------|
|                                                                       |                           |                                       | subunit I | subunit II |                                                      |
|                                                                       |                           | <b>Eubacteria</b>                     |           |            |                                                      |
| <i>Escherichia coli</i> str. K-12 substr. W3110                       | Y75_p0949                 | gamma proteobacteria - enterobacteria | 514       | 378        | <i>bd- I with appABX</i> , also called <i>bd- II</i> |
| <i>Methylocystis</i> sp. SC2                                          | BAB2_0728                 | alpha proteobacteria                  | 530       | 381        | <i>bd- I with appABX</i> , also called <i>bd- II</i> |
| <i>Caenispirillum salinarum</i>                                       | WP_009542797              | alpha proteobacteria                  | 532       | 386        | <i>bd- I with appABX</i>                             |
| <i>Defluviimonas</i> sp. 20V17                                        | KDB05436                  | alpha proteobacteria                  | 531       | 382        | <i>bd- I with appABX</i>                             |
| <i>Ca. Paracaedibacter acanthamoebae</i>                              | AIK95954                  | alpha proteobacteria                  | 512       | 386        | <i>bd- I with appABX</i>                             |
| <i>Commensalibacter intestini</i>                                     | WP_008854848              | alpha proteobacteria                  | 500       |            | <i>bd- I with appABX</i>                             |
| <i>Coxiella burnetii</i> RSA 493 - <i>cydA 1</i>                      | CBU_0218, NP_819263       | gamma proteobacteria                  | 516       | 387        | <i>bd- I with appABX</i>                             |
| <i>Francisella philomiragia</i> subsp. <i>philomiragia</i> ATCC 25017 | Fphi_0633, YP_001677353   | gamma proteobacteria                  | 584       | 398        | <i>bd- I with appABX</i>                             |
| <i>Dechlorosoma suillum</i> PS                                        | Dsui_1915                 | beta proteobacteria                   | 502       | 379        | <i>bd- I with appABX</i>                             |
| <i>Azoarcus</i> sp. BH72 - $\beta$                                    | azo1232                   | beta proteobacteria                   | 522       | 380        | <i>bd- I with appABX</i>                             |
| <i>Desulfohalobus propionicus</i> DSM 2032                            | Despr_0567, WP_015723288. | delta proteobacteria                  | 512       | 383        | <i>bd- I with appABX</i>                             |
| <i>Nitratifactor salsuginis</i> DSM 16511                             | Nitsa_0601                | epsilon proteobacteria                | 510       | 376        | <i>bd- I with appABX</i>                             |
| <i>Leptospirillum ferriphilum</i> YSK                                 | AIA30100                  | Nitrospirales                         | 534       | 379        | <i>bd- I with appABX</i>                             |
| <i>Ca. Odysseella thessalonicensis</i>                                | WP_010297580              | alpha proteobacteria                  | 507       | missing    | <i>bd- I with appABX</i> degenerate                  |
| <i>Bacillus subtilis</i> subsp. <i>subtilis</i> str. 168              | BSU38760, NP_391755       | <b>Firmicutes</b>                     | 468       | 338        | <i>cydABDC</i> operon, prototypic                    |
| <i>Listeria innocua</i> ATCC 33091                                    | EHN60252                  | <b>Firmicutes</b>                     | 510       | 340        | <i>cydABDC</i> operon                                |
| <i>Bacillus selenitireducens</i>                                      | Bsel_2506                 | <b>Firmicutes</b>                     | 459       | 337        | <i>cydABDC</i> operon                                |
| <i>Bacillus selenitireducens</i>                                      | Bsel_0543                 | <b>Firmicutes</b>                     | 452       | 339        | <i>cydABDC</i> operon                                |
| <i>Salsuginibacillus kocurii</i>                                      | WP_018924928              | <b>Firmicutes</b>                     | 447       | 338        | <i>cydABDC</i> operon                                |
| <i>Exiguobacterium</i> sp. AT1b                                       | EAT1b_2777                | <b>Firmicutes</b>                     | 462       | 343        | <i>cydABDC</i> operon                                |
| <i>Bacillus amyloliquefaciens</i>                                     | BAMF_3713                 | <b>Firmicutes</b>                     | 468       | 338        | <i>cydCD</i> transporters in a separate cluster      |
| <i>Bacillus subtilis</i> subsp. <i>subtilis</i> str. 168              | BSU30710, NP_390949       | <b>Firmicutes</b>                     | 443       | 346        | <i>ythABC</i> operon                                 |
| <i>Bacillus subtilis</i> subsp. <i>natto</i> BEST195                  | BSNT_09494, YP_005562287  | <b>Firmicutes</b>                     | 443       | 346        | <i>ythABC</i> operon                                 |
| <i>Bacillus cellulosilyticus</i>                                      | Bcell_0256                | <b>Firmicutes</b>                     | 451       | 337        | <i>ythABC</i> operon                                 |
| <i>Bacillus subtilis</i> subsp. <i>subtilis</i> str. RO-NN-1          | I33_3129, YP_005558044    | <b>Firmicutes</b>                     | 443       | 346        | <i>ythABC</i> operon                                 |
| <i>Bacillus amyloliquefaciens</i> subsp. <i>plantarum</i>             | BANAU_2983                | <b>Firmicutes</b>                     | 445       | 346        | <i>ythABC</i> operon                                 |
| <i>Desulfovibrio magneticus</i> RS-1                                  | YP_002954207              | delta proteobacteria                  | 433       | 342        | close to <i>cydABDC</i> of Firmicutes                |
| <i>Desulfovibrio</i> sp. X2                                           | EPR44720                  | delta proteobacteria                  | 438       | 341        | close to <i>cydABDC</i> of Firmicutes                |
| <i>Geobacter daltonii</i>                                             | Geob_0961, YP_002536424   | delta proteobacteria                  | 441       | 340        | close to <i>cydABDC</i> of Firmicutes                |
| <i>Myxococcus xanthus</i> DK 1622                                     | MXAN_6913, YP_635027      | delta proteobacteria                  | 445       | 342        | close to <i>cydABDC</i> of Firmicutes                |
|                                                                       |                           | <b>Archaea</b>                        |           |            |                                                      |
| <i>Archaeoglobus sulfatocalidus</i> PM70-1                            | Asulf_00260, YP_007906286 | <b>Euryarchaeota</b>                  | 506       | 388        | <i>cydAB</i> only, no Q loop extension               |
| <i>Methanosarcina barkeri</i> str. Fusaro                             | Mbar_A0121, YP_303687     | <b>Euryarchaeota</b>                  | 439       | 347        | <i>cydAB</i> only                                    |
| <i>Vulcanisaeta moutnovskia</i> 768-2                                 | VMUT_1510, YP_004245217   | <b>Crenarchaeota</b>                  | 552       | 372        | <i>cydAB</i> only, no Q loop extension               |
| <i>Vulcanisaeta distributa</i> DSM 14429                              | Vdis_1320, YP_003901757   | <b>Crenarchaeota</b>                  | 469       | 424        | <i>cydAB</i> only                                    |
| <i>Thermoproteus tenax</i> Kra 1                                      | TTX_0142, YP_004891899    | <b>Crenarchaeota</b>                  | 458       | 422        | <i>cydAB</i> only                                    |
| <i>Pyrobaculum neutrophilum</i> V24Sta                                | Tneu_0322, YP_001793719   | <b>Crenarchaeota</b>                  | 530       | 367        | <i>cydAB</i> only, no Q loop extension               |
| <i>Ca. Korarchaeum cryptofilum</i> OPF8                               | Kcr_1584, YP_001738012    | <b>Korarchaeota</b>                   | 538       | 367        | <i>cydAB</i> only, no Q loop extension               |
